# Supplementary material for: Which Is the Most Appropriate PI3K Inhibitor for Breast Cancer Patients with or without PIK3CA Status Mutant? A Systematic Review and Network Meta‐Analysis
Source: Hindawi journal article supplement (doi:10.1155/2020/7451576), 2020-01-01
Supplement: f3 [file 7451576.f3.pdf]

|                  | Random sequence generation (selection bias) | Allocation concealment (selection bias) | Blinding of participants and personnel (performance bias) | Blinding of outcome assessment (detection bias) | Incomplete outcome data (attrition bias) | Selective reporting (reporting bias) | Other bias |
|------------------|---------------------------------------------|-----------------------------------------|-----------------------------------------------------------|-------------------------------------------------|------------------------------------------|--------------------------------------|------------|
| André F 2019     | +                                           | +                                       | +                                                         | +                                               | +                                        | +                                    | +          |
| Baselga J 2017   | +                                           | +                                       | +                                                         | +                                               | +                                        | +                                    | +          |
| Di Leo A 2018    | +                                           | +                                       | +                                                         | +                                               | +                                        | +                                    | +          |
| Krop IE 2016     | +                                           | +                                       | +                                                         | +                                               | +                                        | +                                    | +          |
| Loibl S 2017     | +                                           | +                                       | +                                                         | +                                               | +                                        | +                                    | +          |
| Martín M 2016    | +                                           | +                                       | +                                                         | +                                               | ?                                        | +                                    | +          |
| Rugo HS 2020     | +                                           | +                                       | +                                                         | +                                               | +                                        | +                                    | +          |
| Saura C 2019     | +                                           | +                                       | +                                                         | +                                               | +                                        | +                                    | +          |
| Vuylsteke P 2016 | +                                           | ?                                       | +                                                         | ?                                               | +                                        | +                                    | +          |
