# Supplementary material for: Which Is the Most Appropriate PI3K Inhibitor for Breast Cancer Patients with or without PIK3CA Status Mutant? A Systematic Review and Network Meta‐Analysis
Source: Hindawi journal article supplement (doi:10.1155/2020/7451576), 2020-01-01

A

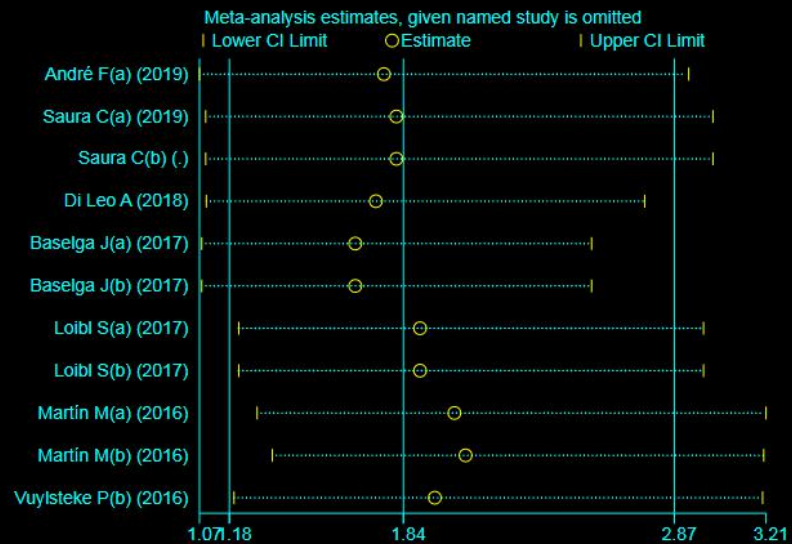

B

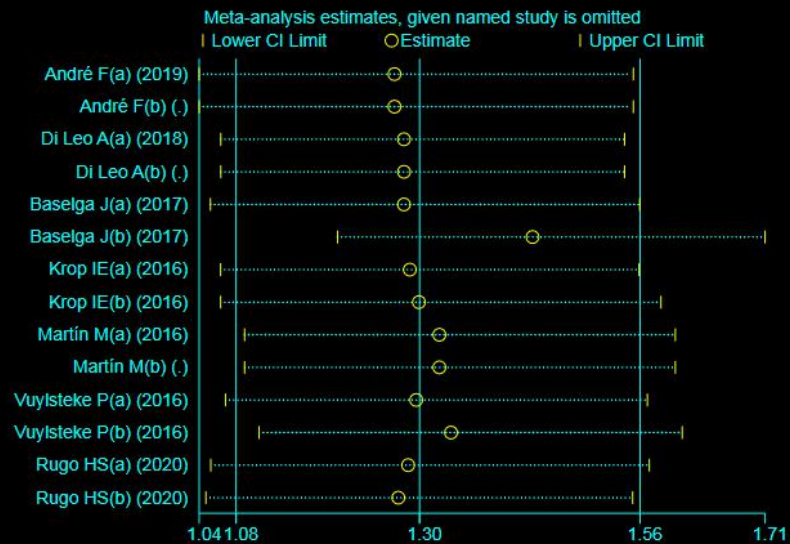

Supplement: f5 [file 7451576.f5.pdf]
