# Supplementary material for: Which Is the Most Appropriate PI3K Inhibitor for Breast Cancer Patients with or without PIK3CA Status Mutant? A Systematic Review and Network Meta-Analysis
Source: Biomed Res Int. 2020 Dec 3;2020:7451576. doi: 10.1155/2020/7451576 (PMC7739049; doi:10.1155/2020/7451576)

Standard error of effect size

0

.5

1

-2

-1

0

1

2

Effect size centred at comparison-specific pooled effect ( $y_{iXY} - \mu_{XY}$ )

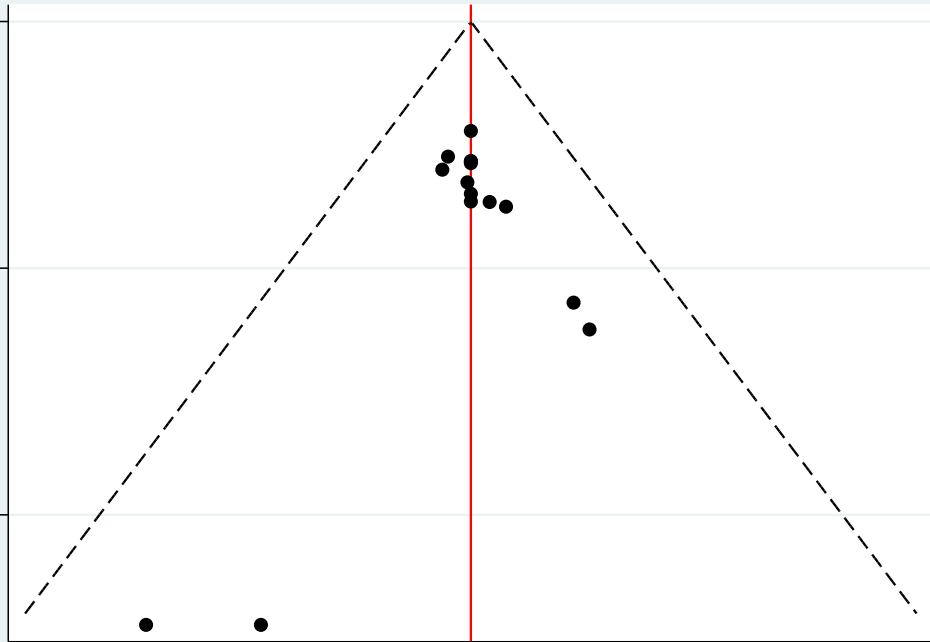

Supplement: Supplementary 4 — Figure S2 Network funnel plot for objective response rate. [file 7451576.f4.pdf]
